# 1 Visualization and Modeling of Inhibition of IL-1 $\beta$ and TNF- $\alpha$ mRNA Transcription 2 at the Single-Cell Level

3  
4 Daniel Kalb<sup>1,+</sup>, Huy D. Vo<sup>2,+</sup>, Samantha Adikari<sup>3</sup>, Elizabeth Hong-Geller<sup>3</sup>, Brian Munsky<sup>2,\*</sup>, James  
5 Werner<sup>1,\*</sup>

6  
7 <sup>1</sup>Center for Integrated Nanotechnologies, Los Alamos National Laboratory

8 <sup>2</sup>Department of Chemical and Biological Engineering, Colorado State University

9 <sup>3</sup>Bioscience Division, Los Alamos National Laboratory

10 <sup>+</sup>These authors contributed equally to this work.

11 <sup>\*</sup>Correspondence to: [brian.munsky@colostate.edu](mailto:brian.munsky@colostate.edu); [jwerner@lanl.gov](mailto:jwerner@lanl.gov)

## 14 Abstract

15 IL-1 $\beta$  and TNF- $\alpha$  are canonical immune response mediators that play key regulatory roles in a  
16 wide range of inflammatory responses to both chronic and acute conditions. Here we employ an  
17 automated microscopy platform for the analysis of messenger RNA (mRNA) expression of IL-1 $\beta$   
18 and TNF- $\alpha$  at the single-cell level. The amount of IL-1 $\beta$  and TNF- $\alpha$  mRNA expressed in a human  
19 monocytic leukemia cell line (THP-1) is visualized and counted using single-molecule fluorescent  
20 in-situ hybridization (smFISH) following exposure of the cells to lipopolysaccharide (LPS), an  
21 outer-membrane component of Gram-negative bacteria. We show that the small molecule  
22 inhibitors MG132 (a 26S proteasome inhibitor used to block NF- $\kappa$ B signaling) and U0126 (a  
23 MAPK Kinase inhibitor used to block CCAAT-enhancer-binding proteins C/EBP) successfully  
24 block IL-1 $\beta$  and TNF- $\alpha$  mRNA expression. Based upon this single-cell mRNA expression data,  
25 we screened 36 different mathematical models of gene expression, and found two similar models  
26 that capture the effects by which the drugs U0126 and MG132 affect the rates at which the genes  
27 transition into highly activated states. When their parameters were informed by the action of each  
28 drug independently, both models were able to predict the effects of the combined drug treatment.  
29 From our data and models, we postulate that IL-1 $\beta$  is activated by both NF- $\kappa$ B and C/EBP, while  
30 TNF- $\alpha$  is predominantly activated by NF- $\kappa$ B. Our combined single-cell experimental modeling  
31 efforts shows the interconnection between these two genes and demonstrates how the single-cell  
32 responses, including the distribution shapes, mean expression, and kinetics of gene expression,  
33 change with inhibition.

## 35 Introduction

36  
37 Inflammation is a complex biological process that enables the host immune system to counteract  
38 potential biothreats. In the inflammatory response, select host receptors react to detrimental stimuli  
39 (e.g., pathogens, allergens, toxins, or damaged host cells), which activate various intracellular  
40 signaling pathways to secrete cytokines that trigger active recruitment of immune cells to the site

41 of insult/infection.[1] While inflammation is usually beneficial to the host organism when fighting  
42 an infection, there is also a wide range of both chronic and acute conditions where remediation of  
43 inflammation is necessary for host recovery. For example, in certain viral infections, over-  
44 expression of inflammatory cytokines throughout the course of disease progression can lead to a  
45 potentially fatal cytokine storm that may be more harmful to the host than the underlying  
46 infection.[2] In addition to acute conditions, chronic inflammatory conditions, including  
47 rheumatoid arthritis, diabetes, [3] or persistent pain, can be caused by high concentrations of pro-  
48 inflammatory cytokines, such as Interleukin 1 $\beta$  (IL-1 $\beta$ ) and Tumor Necrosis Factor  $\alpha$  (TNF- $\alpha$ ).

49  
50 There are several drugs and medications used to limit or dampen the inflammatory response. The  
51 best known of these, non-steroidal anti-inflammatory drugs (NSAIDs), work by inhibiting the  
52 activity of cyclooxygenase enzymes (COX-1 and COX-2), which are important for the synthesis  
53 of key biological mediators and blood clotting agents.[4] Other drugs may act to inhibit key  
54 proteins involved in immune response signaling, such as kinase inhibitors or proteasome  
55 inhibitors. For kinase and proteasome inhibitors, these compounds are generally discovered first  
56 through binding assays, then studied *in vitro* by activity assays.[5-8] Cellular assays that monitor  
57 the effects of drugs in a more complicated environment generally follow such *in vitro* studies.[9]  
58 In a cellular assay, the effects of a drug can be studied by monitoring the level of inhibition of the  
59 target of interest, or may be studied by monitoring changes in a downstream signaling pathway.  
60 The role drugs play in dampening mRNA expression can be measured by quantitative PCR of the  
61 mRNA[10], through DNA microarrays[11], or by RNA sequencing.[12] While informative, most  
62 of these methods explore the response of large, ensemble populations of cells.

63  
64 In contrast to traditional measurements of gene expression collected as bulk averages from large  
65 numbers of individual cells, single-cell techniques have revealed surprisingly rich levels of  
66 heterogeneity of gene expression.[13-16] When coupled with appropriate models, these  
67 distributions of single-cell gene expression can reveal fundamental information on expression  
68 kinetics and gene regulatory mechanisms, which is otherwise lost in the bulk measurements. [17,  
69 18] Methods to measure gene expression in single cells generally rely on either amplification or  
70 imaging techniques. There are tradeoffs between the two techniques. Amplification-based  
71 methods, such as sequencing and PCR, provide high gene depth (tens-to-hundreds of genes can be  
72 analyzed) but can be expensive, generally analyze a small number of individual cells, and obscures  
73 spatial information.[19-23] Imaging methods generally utilize fluorescent oligonucleotide probes  
74 complementary to the RNA sequences of interest and include techniques such as single-molecule  
75 fluorescence *in situ* hybridization (smFISH)[16, 24, 25] and multiplexed barcode labeling  
76 methods.[26-28] Though fewer genes can be analyzed at one time, smFISH is relatively low cost,  
77 yields single-molecule resolution without the need for nucleic acid amplification, can readily  
78 measure several hundreds to thousands of individual cells, and directly visualizes the spatial  
79 location of each RNA copy.

80  
81 There have been several studies that exploit single-cell methods in conjunction with single-cell  
82 modeling to study host inflammatory responses. For example, fluorescence flow cytometry was  
83 used to study the population switching between effector and regulatory T cells and to develop a  
84 computational model describing this dynamic behavior.[29] Application of single-cell RNA  
85 sequencing methods led to discovery of bimodal expression patterns and splicing in mouse  
86 immune cells.[30] Another study integrated live cell imaging and mathematical modeling to  
87 understand the ‘analog’ NF- $\kappa$ B response of cell populations under ‘digital’ single-cell signal

88 activation.[31] Additionally, a model of JAK1-STAT3 signaling was constructed following cell  
89 treatment by a JAK inhibitor with validation by wide field fluorescence microscopy.[32] In order  
90 to visualize single-cell immune responses, our lab previously used smFISH to monitor the single-  
91 cell mRNA expression of two cytokines, IL-1 $\beta$  and TNF- $\alpha$ , in a human monocytic leukemia cell  
92 line, THP-1, in response to lipopolysaccharide (LPS), a primary component of cell walls in Gram  
93 negative bacteria.[33] This work found a broad cell-to-cell heterogeneity in immune cell response  
94 to LPS.

95  
96 Here, we exploit single-cell imaging and modeling methods to visualize and understand the broad  
97 distribution of mRNA responses to LPS stimulation in THP-1 immune cells. Moreover, these  
98 models were used to describe the effects of specific inflammatory inhibitors on the host immune  
99 response. The drugs employed, MG132, a 26S proteasome inhibitor used to block NF- $\kappa$ B  
100 signaling[8], and U0126, a MAPK kinase inhibitor known to block CCAAT-enhancer-binding  
101 proteins C/EBP[34], were selected for their differing roles in dampening the inflammatory  
102 response mediated by two key inflammatory cytokines: IL-1 $\beta$  and TNF- $\alpha$ . Our results show that  
103 MG132 inhibits both IL-1 $\beta$  and TNF- $\alpha$  mRNA expression, while U0126 primarily inhibits IL-1 $\beta$   
104 expression. Models derived for the action of each drug independently can also accurately predict  
105 the behavior of the drug effects when applied in tandem. These results and models support the  
106 current biological understanding that IL-1 $\beta$  expression is activated by both NF- $\kappa$ B and C/EBP  
107 signaling pathways while TNF- $\alpha$  is predominantly activated by NF- $\kappa$ B. Notably, we observe that  
108 models developed to describe the effect single drugs can accurately predict the effect of drug  
109 combinations, paving the way for predictive computational analyses of combination drug  
110 therapies.

111

## 112 **Methods**

### 113 *Microscopy and Image Analysis*

114 A fully automated microscopy and image analysis routine was used to count and measure single-  
115 mRNA molecules as previously described.[33] In brief, a conventional wide-field microscope  
116 (Olympus IX71), arc lamp (Olympus U-RFL-T), high NA objective (Olympus 1.49 NA, 100X),  
117 2D stage (Thorlabs BSC102), Z sectioning piezo (Physik Instrumente, PI-721.20) and CMOS  
118 camera (Hamamatsu orca-flash 4.0) are used to image single-cell mRNA content. Following image  
119 acquisition, a custom MATLAB script is used to: 1) automatically find and segment each  
120 individual cell based upon the bright-field cell image, the nuclear stain (DAPI), and the smFISH  
121 channel, 2) filter and threshold using a Laplacian-of-Gaussian filter (LOG) to find the single-  
122 mRNA copies, 3) fit all of the mRNA 'spots' to a 2D Gaussian using a GPU-accelerated algorithm,  
123 and 4) assign and count all single mRNA copies within each cell. Single-cell distributions are  
124 characterized by both their shapes and their mean values.

125

### 126 *Cell Culture*

127 Human monocytic leukemia cells (THP-1, ATCC) were cultured in a humidified incubator with  
128 5% CO<sub>2</sub> at 37°C in R10% medium: RPMI-1640 Medium (with glutamine, no phenol red, Gibco)  
129 supplemented with 10% fetal bovine serum (FBS, ATCC). Cells were passaged every 5-7 days  
130 and used for experiments from age 60-120 days.

131

### 132 *Slide Preparation*

133 Chambered cover-glass slides (#1.0 borosilicate glass, 8 wells, Lab-Tek) were coated with a sterile  
134 bovine fibronectin solution (1 $\mu$ g/well, Sigma, diluted in PBS, Gibco) overnight at 4°C. 10<sup>5</sup> THP-  
135 1 cells/well were seeded onto fibronectin-coated slides for differentiation with R10% medium  
136 containing 100nM PMA (phorbol 12-myristate 13-acetate, Sigma) for 48hrs at 37°C. After  
137 differentiation, cells were serum-starved in serum-free RPMI-1640 Medium (no FBS) for 2hrs at  
138 37°C. Cells were pre-treated with inhibitors (MG132, or U0126, or both) for 1hr at 37°C (10 $\mu$ M  
139 each in serum-free RPMI-1640 medium, 200 $\mu$ L/well). Untreated wells were kept in serum-free  
140 RPMI-1640 medium for 1hr at 37°C. Cells were then stimulated with a cocktail of 500 $\mu$ g/mL  
141 lipopolysaccharide (LPS, isolated from *E.coli* O55:B5, Sigma) and 10 $\mu$ M inhibitors (MG132, or  
142 U0126, or both) in R10% medium (200 $\mu$ L/well) for 30min, 1hr, 2hrs, or 4hrs at 37°C. Cells were  
143 washed in PBS and fixed in paraformaldehyde (4% solution in PBS (v/v), Alfa Aesar) for 15min  
144 at room temperature. Unstimulated cells were washed and fixed at t=0hrs immediately after 1hr  
145 inhibitor pre-treatment. After fixation, cells were washed twice in PBS, then permeabilized in  
146 70% ethanol in RNase-free distilled water (v/v) (ThermoFisher) for at least 1hr (or up to 24 hrs)  
147 at 4°C. Cells were then washed in RNA FISH Wash Buffer A (Stellaris) for 20min at room  
148 temperature before RNA smFISH staining for mRNA.

149

### 150 *smFISH Staining for mRNA*

151 Cells were stained with custom-designed RNA FISH probes (Stellaris) for IL-1 $\beta$  and TNF- $\alpha$   
152 mRNA. Probes were diluted to 100nM each in RNA FISH Hybridization Buffer (Stellaris)  
153 containing 10% formamide (v/v) (ThermoFisher), then incubated on the fixed and permeabilized  
154 cells using 100 $\mu$ L/well for 4hrs at 37°C. Staining conditions were made in duplicate on each slide.  
155 Following probe hybridization, cells were washed three times in RNA FISH Wash Buffer A for  
156 30min each time at 37°C, stained for 20min at 37°C with 100ng/mL DAPI solution (Life  
157 Technologies) in RNA FISH Wash Buffer A for 20min at 37°C, and washed in RNA FISH Wash  
158 Buffer B (Stellaris) for 20min at room temperature. Cells were washed once in PBS and stored in  
159 200 $\mu$ L/well SlowFade Gold Anti-Fade Mountant (Life Technologies) diluted 4x in PBS for up to  
160 7 days at 4°C. Unless otherwise specified, all steps were performed at room temperature,  
161 incubations were performed using 250 $\mu$ L/well, and washes were performed using 500 $\mu$ L/well.

162

### 163 *Stochastic reaction networks for modeling gene expression dynamics*

164 The time-varying distributions of mRNA copy numbers observed from smFISH experiments are  
165 modeled in the framework of the chemical master equation (CME).[35, 36] This analysis proposes  
166 a continuous-time Markov chain in which each discrete state corresponds to a vector of integers  
167 that represents the copy number for each chemical species. In particular, we propose and compare  
168 different gene activation mechanisms with either two or three gene states and different ways in  
169 which the signal affects the gene activation/deactivation rates (see SI for details).

170

171 The probabilistic rate of a reaction event is determined through the propensity functions. The time-  
172 dependent probability vector  $p(t)$  over all states is the solution of the system of linear differential  
173 equations  $\frac{d}{dt}p(t) = A(t)p(t)$ , where  $A(t)$  is the transition rate matrix of the Markov chain. The  
174 CME was solved using the Finite State Projection (FSP) approach for marginal distributions.[37]  
175 All analysis codes are available at [https://github.com/MunskyGroup/Kalb\\_Vo\\_2021](https://github.com/MunskyGroup/Kalb_Vo_2021).

176

177 *Conditionally independent models for simultaneous expression of multiple genes and in*  
178 *variable environmental conditions*

179 The stochastic reaction network model above allows us to model the time-varying mRNA  
180 distribution for a *single* gene in a *single* experimental condition. However, our data comes with  
181 multiple genes and inhibitor treatment conditions, which necessitates a model to explain the joint  
182 mRNA count distribution of both IL-1 $\beta$  and TNF- $\alpha$  simultaneously. To do so, we make the  
183 assumption that the random variables describing IL-1 $\beta$  and TNF- $\alpha$  mRNA counts are *conditionally*  
184 independent, given a shared dependence on the same upstream time-varying NF $\kappa$ B dynamics.  
185 These downstream gene expression variables are otherwise independent from each other, and can  
186 then be described by separated reaction networks that are coupled only by time, specific  
187 experiment condition, and the choice of parameters for the NF $\kappa$ B reaction rates and the inhibitor  
188 effects. See SI for the precise mathematical description of this model.

189

190 *Parameter fitting*

191 The full single-cell dataset consists of four independent biological replicates, each of which  
192 contains measurements of IL-1 $\beta$  and TNF- $\alpha$  mRNA copy numbers under four different inhibitor  
193 conditions (No inhibitor, with MG132, with U0126, and with both MG132 and U0126) and five  
194 measurement time points after LPS stimulation (0min (untreated), 30min, 1hr, 2hrs, and 4hrs). The  
195 ‘training’ dataset on which our CME model was parameterized consists of measurements made  
196 under three conditions (No inhibitor, with MG132, and with U0126). Parameters were estimated  
197 by minimizing the weighted sum of Kullback-Leibler divergences from the marginal empirical  
198 distributions of single-cell observations to those predicted by the CME model, which is equivalent  
199 to the log-likelihood of the observed joint distributions given the conditionally-independent model  
200 described in the previous section (See Section 3c in Supplementary Information). Evaluation of  
201 this likelihood requires the solutions of the CME, which were obtained using the Finite State  
202 Projection (FSP) algorithm.[37] (See SI for more details).

203

204 *Model evaluation and selection*

205 We use a combination of statistical criteria to compare how well the different proposed  
206 mechanisms fit the ‘training’ data. These include the fit log-likelihood and the Bayesian  
207 Information Criteria (BIC, see Supplementary Information). In addition, we also compare the  
208 predictive performance of these alternative models using the log-likelihood of the dataset under  
209 the combined treatment that has both MG132 and U0126, which were not used for fitting the  
210 models.

211 **Results**

212

213 *Inhibitor treatments reduce transcription levels of IL-1 $\beta$  and TNF- $\alpha$  in THP-1 human*  
214 *monocytic leukemia cells*

215 The single-cell mRNA content of IL-1 $\beta$  and TNF- $\alpha$  in THP-1 cells were monitored over time after  
216 exposure to LPS and in response to two small molecule inhibitors MG132 and U0126, both alone  
217 and in combination. MG132 is a selective inhibitor of the NF- $\kappa$ B pathway, while U0126 inhibits  
218 the C/EBP pathway, part of the MAPK signaling cascade. [8, 38, 39] Representative images of  
219 gene expression after LPS exposure in the presence and absence of small molecule inhibitors are  
220 shown in Figures 1 and 2 for 1 and 2 hours post exposure.



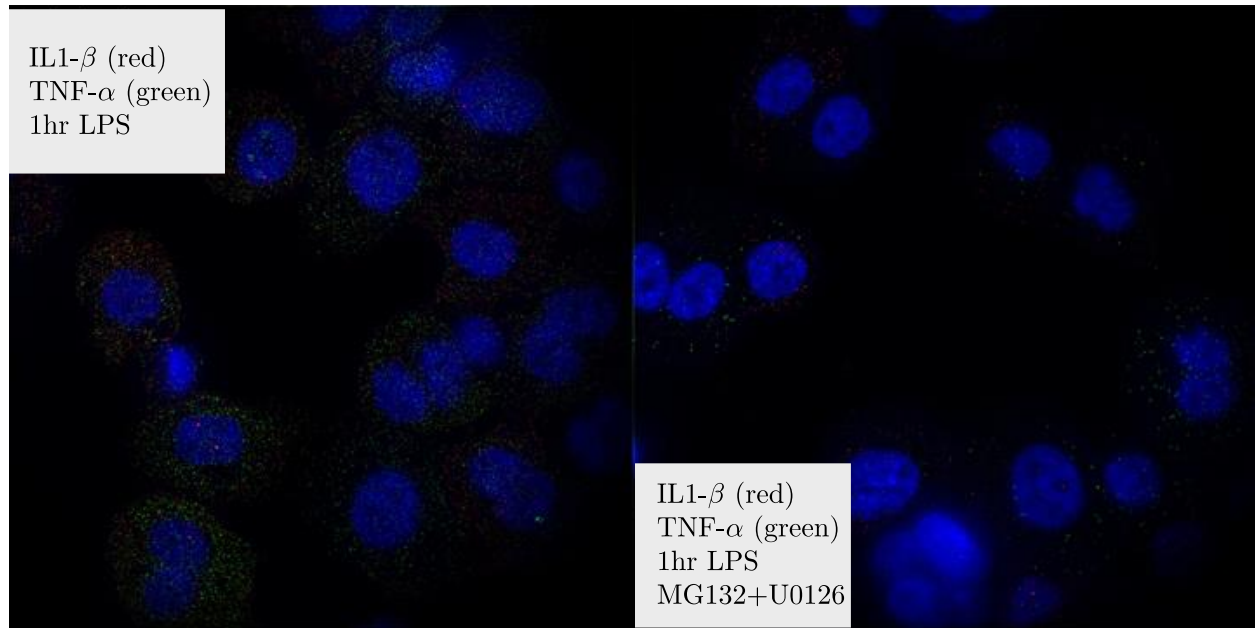

221  
222  
223  
224  
225  
226

Figure 1. Representative images of IL-1 $\beta$  and TNF- $\alpha$  mRNA expression with and without inhibitors at 2 hrs LPS exposure. Images are LOG-filtered to emphasize single mRNA copies that appear as small diffraction limited spots in images. Blue is DAPI-stained nuclei, whereas red spots are individual copies of IL-1 $\beta$  and green spots are individual copies of TNF- $\alpha$ . Each image is ~130 by 130  $\mu$ m.

227

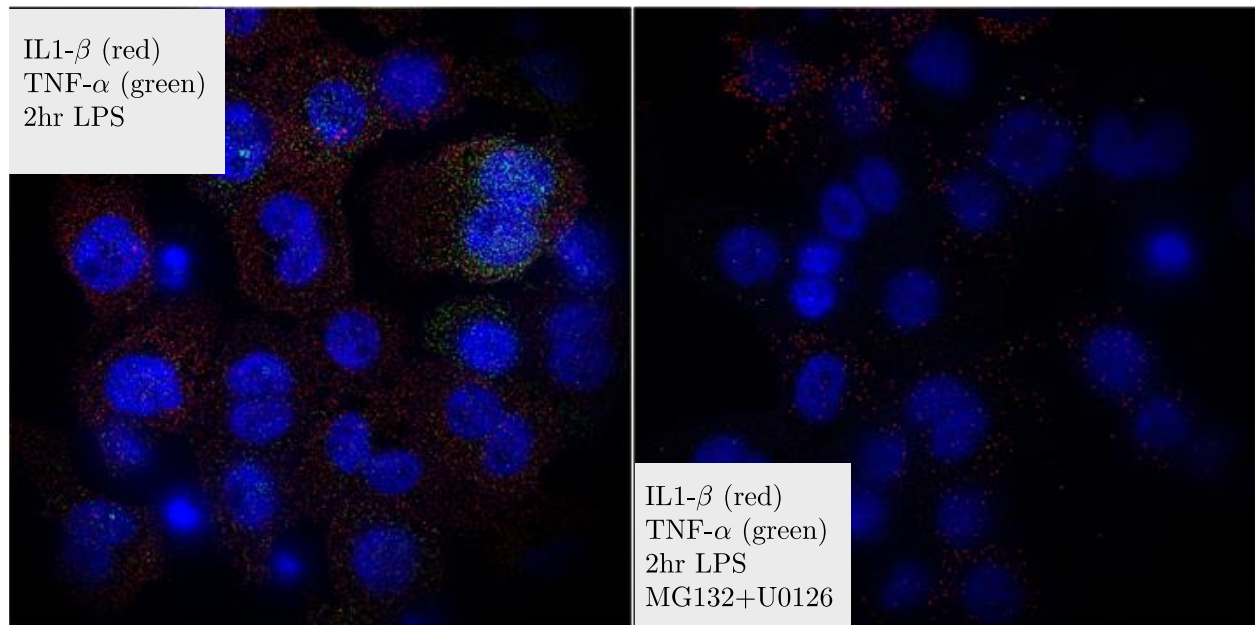

228  
229  
230  
231  
232

Figure 2. Representative images of IL-1 $\beta$  and TNF- $\alpha$  mRNA expression with and without inhibitors at 2 hrs LPS exposure. Images are LOG-filtered to emphasize single mRNA copies that appear as small diffraction limited spots in images. Blue is DAPI-stained nuclei, whereas red spots are individual copies of IL-1 $\beta$  and green spots are individual copies of TNF- $\alpha$ . Each image is ~130 by 130  $\mu$ m.

233  
234  
235  
236

*IL-1 $\beta$  and TNF- $\alpha$  transcriptional responses to inhibitor conditions can be explained and predicted by signal-activated, multiple-state, stochastic bursting mechanisms*

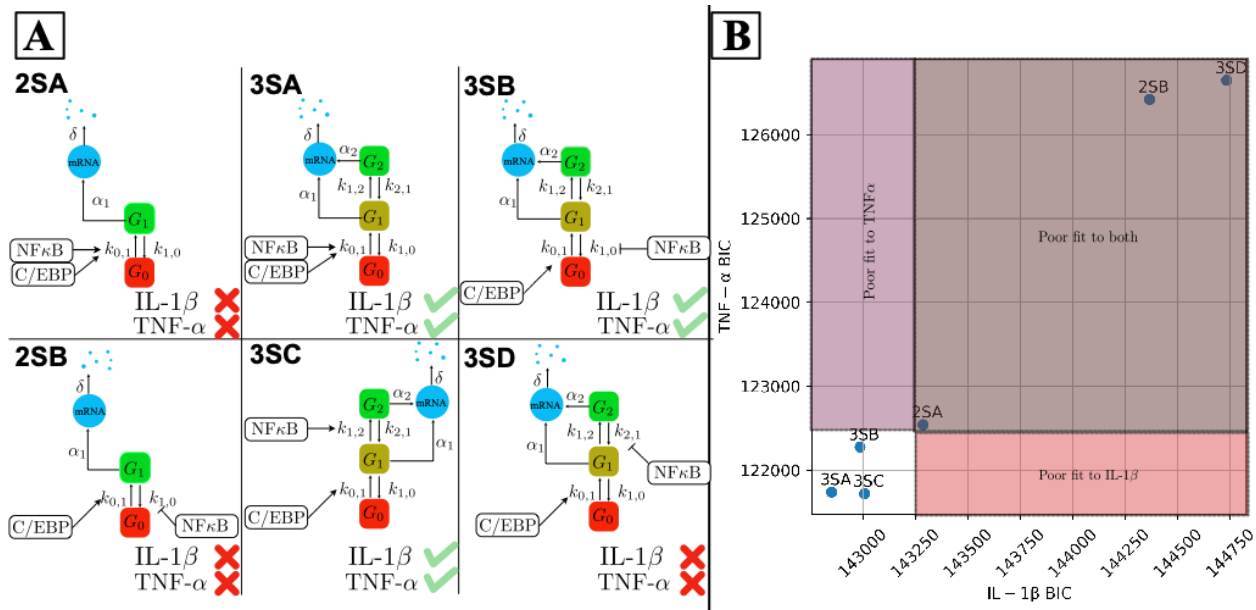

237  
238  
239  
240  
241  
242

Figure 3. Signal-activated two- and three-state gene expression models considered for fitting the observed mRNA distributions. (A): Schematic diagrams of the six mechanisms considered. These models differ in the number of gene states and the mechanism by which NF- $\kappa$ B increases the probability of transcription, either by increasing the rate of gene activation or inhibiting the rate of gene deactivation. (B): Performance evaluation of these models in terms of the Bayesian Information Criterion (BIC) based on IL-1 $\beta$  expression data and TNF- $\alpha$  expression data without inhibitor.

243  
244

A class of several different two-state and three-state gene expression models were hypothesized to capture the stochastic transcriptional dynamics of the individual genes TNF- $\alpha$  and IL-1 $\beta$  (see Figure 3 for the schematics of these models). This class of model topologies has been used successfully in other works that examine MAPK-induced gene expression in single-cells.[40, 41] Here we present the interpretation of model ‘3SA’ in Figure 3 as an example (see Supplementary Information for the full list of reactions and parameters). In this model, each gene can exist in one of three transcriptional states:  $G_0$ ,  $G_1$ , or  $G_2$ . The biological interpretation of these states depends upon the specific parameter values chosen for the state’s transcription rate. For example, when the transcription rate in  $G_0$  is set to zero, then that could be thought of as an ‘off’ state; when the transcription rate in  $G_2$  is large, then that can be thought of as an ‘on’ state; and when the transcription in  $G_1$  takes an intermediate value, it could be described as a ‘ready’ or ‘poised’ state. The activation of each gene by C/EBP and NF- $\kappa$ B signals was modeled via time-dependent effects on gene-state transition rates. Specifically, for the model shown in Figure 3, the switching rate from  $G_0$  to  $G_1$  was assumed to depend on the time-varying abundance of NF- $\kappa$ B, where NF- $\kappa$ B increases the rate at which an ‘off’ gene switches to ‘ready’. More precisely, the time-dependent deactivation rate is given by  $k_{01}(t) = k_{01} + b_{01}[NF - \kappa B](t)$ , where  $k_{01}$  is the basal gene activation rate and  $[NF - \kappa B](t)$  is the concentration of NF- $\kappa$ B, parametrized by a function of the form

262  
263

$$[NF - \kappa B](t) = e^{-r_1 t}(1 - e^{-r_2 t}).$$

264 This model of NF- $\kappa$ B activation is in general agreement with the literature on NF- $\kappa$ B nuclear  
265 localization.[42] C/EBP was assumed to exert a constant influence on the rate of switching from  
266  $G_0$  to  $G_1$ . The expression dynamics of different genes (IL-1 $\beta$ , TNF- $\alpha$ ) in response to different  
267 treatments (No inhibitors, with MG132, U0126, or both) were described by chemical master  
268 equations (CMEs) with the same reactions but different kinetic rate parameters. The effects of  
269 inhibitors, when present, were modeled as the reductions to the influence that C/EBP or NF- $\kappa$ B  
270 exerted on gene activation.

271  
272 We first attempt to independently fit the six gene expression models to the observed distributions  
273 of IL-1 $\beta$  and TNF- $\alpha$ , each individually under the inhibitor-free condition. Evaluating these fits  
274 using the Bayesian Information Criterion (BIC), we found that three of the different three-state  
275 models outperform all variants of the two-state models for both genes. From this comparison, we  
276 select these three variants of the three-state models and then extend them to postulate nine different  
277 model combinations (see Supplementary Figure 3), and we fit each of these models simultaneously  
278 to the mRNA distributions of both genes across all five time points and three experimental  
279 conditions (the remaining 27 combinatorial models that could have been constructed using one or  
280 more of the discarded models from above are ignored at this stage, although the effect of choice  
281 will be evaluated later). Specifically, we use the experimental data collected under inhibitor-free,  
282 MG132, and U0126 treatments to calibrate the parameters of all models. The full set of chemical  
283 reactions, as well as the fitted parameter values, are presented in the Supplementary Information.  
284 We then use the data under combined treatment (with both MG132 and U0126) as a testing dataset  
285 to see how well each of the fitted models predicts mRNA distributions under this experimental  
286 condition. The two models that yield the largest sum of the fit log-likelihood (computed on the  
287 training dataset under no or single inhibitor treatment) and the test log-likelihood (computed on  
288 the testing dataset under combined inhibitor treatment) are selected and illustrated in Figure 4. We  
289 confirm that these two models continue to provide good fits to the wildtype IL-1 $\beta$  and TNF- $\alpha$   
290 expression data even when fitted simultaneously to both genes in all three conditions  
291 (Supplementary Figure 4). Moreover, since the final models continue to outperform the three  
292 previously discarded single-gene models for both genes in the drug-free condition, we are assured  
293 that these final models must also outperform all 27 of the discarded two-gene combinatorial  
294 models to match the drug-free data.

295 In the two combinatorial models selected (Figure 4), both mRNA species are transcribed via bursty  
296 mechanisms with three gene states. Both models suggest an identical gene expression mechanism  
297 for TNF- $\alpha$ , but provide different explanations for the expression of IL-1 $\beta$ . Specifically, they differ  
298 in how the effects of NF- $\kappa$ B signal on IL-1 $\beta$  gene activation are explained. The first combinatorial  
299 model (CM1) postulates that the presence of NF- $\kappa$ B enhances the transition rate for IL-1 $\beta$  from  $G_1$   
300 to  $G_2$  by an additive term proportional to NF- $\kappa$ B concentration in the nucleus. On the other hand,  
301 the second combinatorial model (CM2) postulates that the same signal inhibits the deactivation  
302 rate of IL-1 $\beta$  for transiting from  $G_1$  to  $G_0$ . In either case, the activity of NF- $\kappa$ B leads to a greater  
303 chance that the gene moves from the ‘off’ state and through the ‘ready’ state to reach the ‘on’ state.  
304

305 Figure 5 shows the single-cell mRNA distribution shapes of both IL-1 $\beta$  and TNF- $\alpha$  in response to  
306 LPS as well as the best combined model fit to these data, and Supplementary Figures 6 and 7 show  
307 expanded results for the fits of both genes in all time points and conditions. For both genes, the  
308 data are indicative of ‘bursting’ gene expression, characterized by most cells exhibiting lower  
309 expression and a long ‘tail’ of relatively rare high-expressing cells. The distributions of mRNA  
310 copies per cell in the presence of the small-molecule inhibitors (Figure 5(B-D) and Figure 5(F-H))



311 retain their bursting shape (similar to the expression patterns seen with no LPS (Figure 5A and  
 312 Figure 5E)). Based upon how the cell-to-cell mRNA distributions change in the presence of the  
 313 drugs MG132 and U0126, we postulated that these drugs could modulate how NF- $\kappa$ B or C/EBP  
 314 regulate gene expression. We note that kinetic parameters were determined from the measured  
 315 mRNA distributions in the drug free and single-drug exposure time-course experiments (Table 1).  
 316 These parameters then were used to predict the combined drug condition (without any additional  
 317 fitting of the data), yielding a good approximation of the measured mRNA distributions (Figure 5  
 318 D,H and bottom rows of Supplementary Figures 6 and 7).  
 319

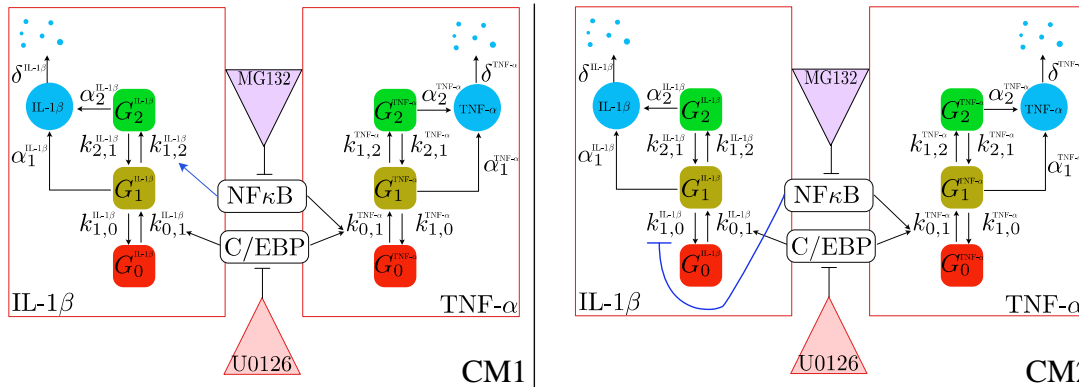

320  
 321 *Figure 4. Two combinations of three-state gene expression models to simultaneously fit and predict the mRNA distributions*  
 322 *transcribed from both IL-1 $\beta$  and TNF- $\alpha$ . These models are selected from a set of nine different combinations that can potentially*  
 323 *explain the observed mRNA distributions in the experiment. In the first combined model (CM1), NF- $\kappa$ B enhances the transition*  
 324 *rate from G<sub>1</sub> to G<sub>2</sub> for the gene IL-1 $\beta$ . In the second model (CM2), NF- $\kappa$ B inhibits the deactivation rate for IL-1 $\beta$  to switch from*  
 325 *G<sub>1</sub> to G<sub>0</sub>.*

326

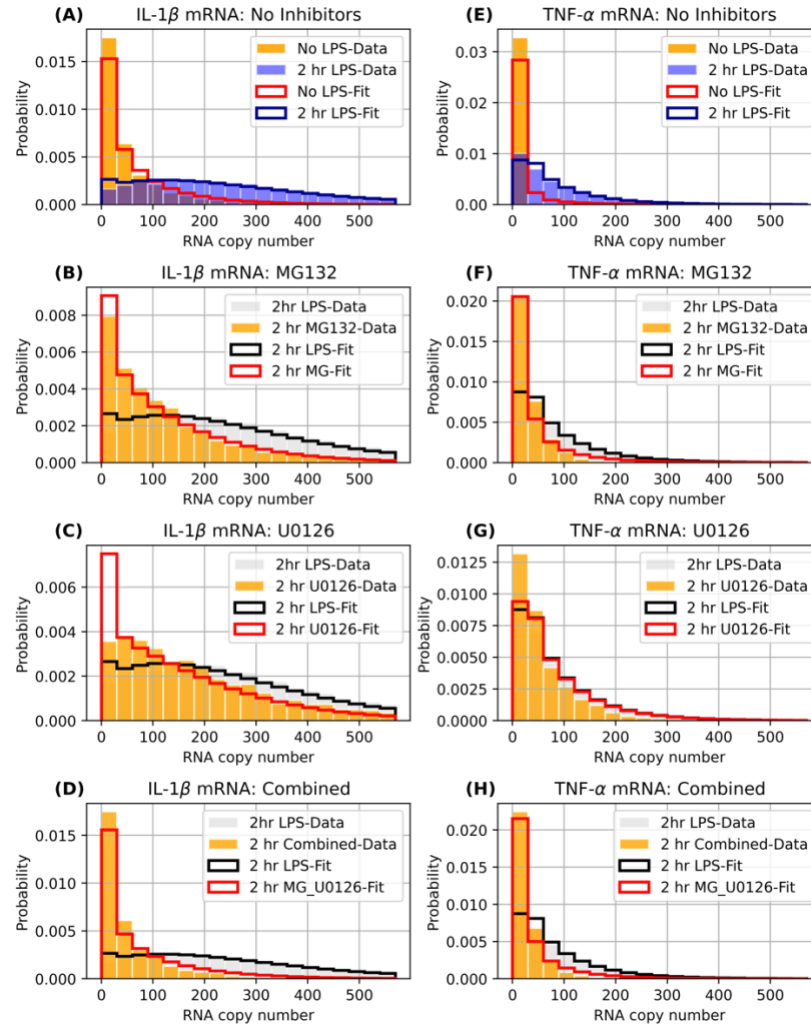

327  
328  
329  
330  
331  
332  
333  
334

Figure 5. Distributions for single-cell mRNA content. (A-D) Probability distribution (data represented as bars, model fits/predictions as solid lines) for number of IL-1 $\beta$  copies per cell with: (A) 2hr LPS exposure with no inhibitor treatment, (B) 2hr LPS exposure with MG132, (C) 2hr LPS exposure with U0126, and (D) 2hr LPS exposure with U0126 and MG132 combined. (E-H) same as (A-D), but for TNF- $\alpha$ . For reference, each panel shows the corresponding mRNA distribution at 2hr LPS exposure with no inhibitor treatment (data in grey, model in black). A-C and E-H show the model fits to data with no inhibitors or a single inhibitor, and D,H show the validation of model predictions for the two inhibitor combination.

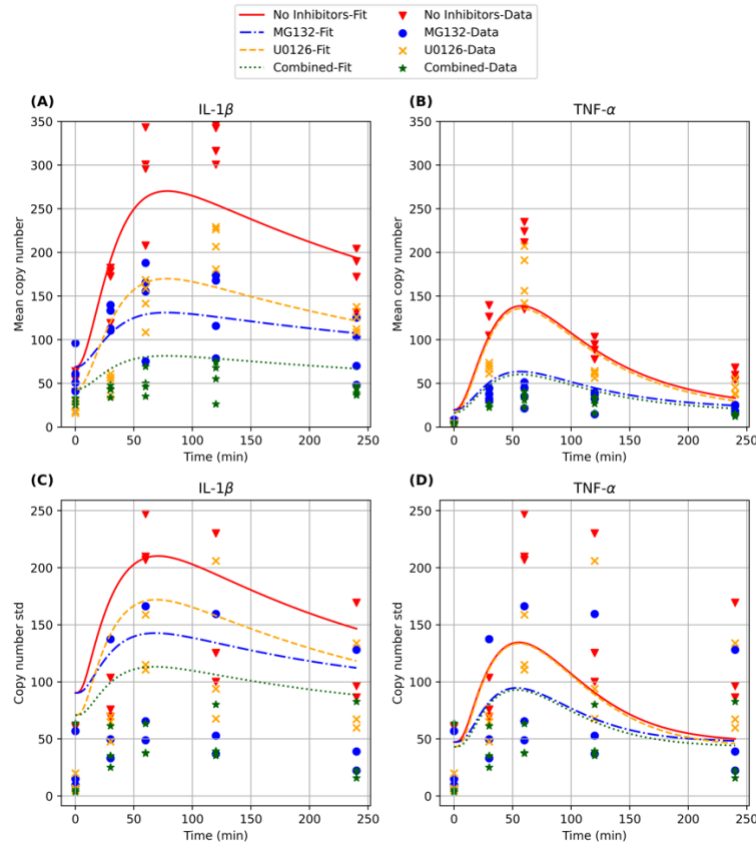

335  
336

337 *Figure 6. Mean and standard deviation of mRNA copy numbers per cell with and without inhibitors over 4hrs of LPS exposure*  
 338 *(timepoints 0min, 30min, 1hr, 2hr, and 4hr) estimated from four independent biological replicates per inhibitor condition (markers)*  
 339 *and model fits based on the combinatorial model CMI (solid and dashed lines). (A)&(B): mean mRNA copy numbers per cell for*  
 340 *IL-1 $\beta$  and TNF- $\alpha$ . (C)&(D): standard deviations of mRNA copy numbers per cell for IL-1 $\beta$  and TNF- $\alpha$ . See Supporting Information*  
 341 *(section 1b) for details on our computation of these model-predicted statistics.*

342  
343

344 *Measurement and analysis of mRNA expression suggests that MG132 inhibits both TNF-*  
 345  *$\alpha$  and IL-1 $\beta$ , while U0126 inhibits only IL-1 $\beta$*

346

347 Figure 6 shows the measured and model-predicted mean (Figures 6A-B) and standard deviation  
 348 (Figures 6 C-D) for mRNA expression versus time from 0 to 240 min post LPS exposure for  
 349 both genes. In the absence of inhibitors, the cells show a rapid increase in both IL-1 $\beta$  and TNF- $\alpha$   
 350 mRNA content following introduction of LPS, with expression peaking at ~325 IL-1 $\beta$  mRNA  
 351 copies per cell at 2 hrs and at ~200 TNF- $\alpha$  mRNA copies per cell at 1 hr. In the presence of  
 352 inhibitors, we see that IL-1 $\beta$  expression is inhibited by both U0126 and MG132, but with  
 353 different kinetic trajectories. MG132 treatment dampens IL-1 $\beta$  expression with maximum  
 354 expression at ~140 mRNA copies per cell at 1 hr. In contrast, U0126 strongly inhibits IL-1 $\beta$   
 355 expression at early time points (0-30 min), but is less effective at later time points, with maximal  
 356 expression at ~200 mRNA copies per cell after 120 min. The combination of the two inhibitors  
 357 results in low expression of IL-1 $\beta$  across all time points, with <50 mRNA copies per cell. For  
 358 TNF- $\alpha$ , MG132 markedly reduces expression from ~200 mRNA copies per cell to <50 mRNA

359 copies per cell at 60 min. Interestingly, U0126 shows very little inhibition of TNF- $\alpha$  when used  
360 alone. Addition of both inhibitors led to low expression of TNF- $\alpha$ , similar to MG132 treatment  
361 alone. In the rest of this section, we will provide a more detailed explanation of these  
362 observations based on the model fits.

363  
364

365 *The selected three-state gene expression models provide descriptive explanations for the*  
366 *activation dynamics of IL-1 $\beta$  and TNF- $\alpha$  under LPS stimulation*

367

368 The two best-fit models allow us to propose several mechanisms for signal-activated expression  
369 of IL-1 $\beta$  and TNF- $\alpha$ , as well as how these mechanisms are affected by the small-molecule  
370 inhibitors MG132 and U0126. The inferred dynamics of NF- $\kappa$ B concentration, which are not  
371 directly observed from data, is qualitatively similar between two models (Figure 7A). For TNF- $\alpha$ ,  
372 both models yield similar fitted parameters that lead to identical interpretation. In the absence of  
373 LPS, the deactivation rate  $k_{10}$  for TNF- $\alpha$  is about 385 times higher than the activation rate  $k_{01}$  for  
374 model CM1 (similar comparison for CM2). As a consequence, the gene spends most of its time in  
375 the basal state that has a very low basal mRNA production rate ( $\sim 10^{-5}$  molecules per second).  
376 Under LPS stimulation, NF- $\kappa$ B concentration in the nucleus quickly increases to its maximal value  
377 in about 15 minutes, with the downstream effects of increasing the fractions of cells in the active  
378 states (Figure 7C and 7E). As a consequence, there is a temporary increase in the mean mRNA  
379 production rate (Figure 7G), which explains the increased width of the distribution of TNF- $\alpha$   
380 mRNA copy numbers observed. The signal starts decaying shortly after reaching its peak at around  
381 15 minutes, resulting in less mRNA being produced and the mean TNF- $\alpha$  copy number slowly  
382 decreases (Figure 6B).

383

384 For IL-1 $\beta$ , both models produce similar mRNA copy number distributions at the time points where  
385 experimental measurements were taken across experimental conditions (Supplementary Figure 6).  
386 In addition, parameter fits for both models suggest that mRNA transcription rates are low when  
387 IL-1 $\beta$  is in the states  $G_0$  and  $G_1$  (of the order of  $10^{-4}$  and  $10^{-5}$  respectively in model CM1, and  
388  $5 \times 10^{-5}$  and  $10^{-6}$  respectively in model CM2), while the transcription rate at state  $G_2$  is high  
389 (both models fit to approximately one molecule per second). These fits allow us to interpret for  
390 IL-1 $\beta$  the state  $G_1$  as an intermediate “permissive” state from which the gene can become fully  
391 active at  $G_2$ . Prior to LPS stimulation, the rate at which IL-1 $\beta$  switches to the fully active state  $G_2$   
392 from the intermediate state  $G_1$  is about 212 times smaller than the reverse rate in model CM1 (and  
393 15 times smaller in model CM2). As a consequence, IL-1 $\beta$  stays in the basal state for most cells,  
394 with model CM1 suggesting that a significant fraction of the cells are in the intermediate state  
395 without switching over to the highly active state  $G_2$ , whereas model CM2 suggests that the fractions  
396 of cells in  $G_1$  and  $G_2$  are both low (Figure 7B,D). As a consequence, IL-1 $\beta$  stays in the basal states  
397 for most cells. Upon LPS induction, however, the increased NF- $\kappa$ B concentration either has a  
398 positive effect on the rate for switching from  $G_1$  to  $G_2$  (model CM1), or an inhibitory effect on the  
399 deactivation rate from  $G_1$  to  $G_0$ . This either allows for more cells already in the intermediate state  
400  $G_1$  to switch to the active state  $G_2$  (model CM1), or for a significant increase in the fraction of cells  
401 in state  $G_1$  that consequently switch to  $G_2$  (model CM2) (Figure 7B). Either way, IL-1 $\beta$  has  
402 markedly higher probability to be in the fully activated state  $G_2$  (Figure 7D), leading to an increase  
403 in the mean IL-1 $\beta$  mRNA transcription rate. This increased production is sustained for a relatively  
404 short time but achieves a high maximal value in model CM1, while it is sustained for longer but



405 with a lower maximum in CM2. Despite these differences for the intermediate, unobserved,  
 406 components, both models yield fits for IL-1 $\beta$  degradation rates whose relative differences are  
 407 below ten percent ( $5.67 \times 10^{-5}$  molecules/second in CM1 and  $5.27 \times 10^{-5}$  molecules/second in  
 408 CM2). The longer half-life of IL-1 $\beta$  compared to TNF- $\alpha$  also explains why mean IL-1 $\beta$  mRNA  
 409 levels remain higher than TNF- $\alpha$  despite both genes reverting to their basal levels as NF- $\kappa$ B fades  
 410 away at about 100 minutes.

411

412 *The selected models suggest that NF- $\kappa$ B activates both TNF- $\alpha$  and IL-1 $\beta$ , while C/EBP*  
 413 *has no major influence on TNF- $\alpha$  transcriptional activity*

414

415 In addition to providing explanations for IL-1 $\beta$  and TNF- $\alpha$  transcriptional dynamics under LPS,  
 416 our exhaustive search for the reaction network parameters (Table 1) also leads to a quantitative  
 417 understanding of the effects of the small-molecule inhibitors MG132 and U0126 on these genes.  
 418 In the presence of the inhibitor MG132, the activation effect of NF- $\kappa$ B is substantially reduced for  
 419 both genes (for model CM1, the ratio  $b_{01}/b_{01}^{MG}$  is about 2.9 for TNF- $\alpha$  and  $b_{12}/b_{12}^{MG}$  is about 3.4  
 420 for IL-1 $\beta$ ; for model CM2, the ratio  $b_{01}/b_{01}^{MG}$  is about 2.9 for TNF- $\alpha$  and  $b_{10}/b_{10}^{MG}$  is about 9.7  
 421 for IL-1 $\beta$ ), leading to smaller fractions of cells in the active states and consequently lower overall  
 422 TNF- $\alpha$  mRNA production. The inhibitor U0126 decreases the activation rate  $k_{01}$  of IL-1 $\beta$  by 2.18  
 423 fold in CM1 and 4 fold in CM2, leading to overall reduction in IL-1 $\beta$  transcription. On the other  
 424 hand, the addition of U0126 only reduces the rate  $k_{01}$  from  $1.21 \times 10^{-4}$  to  $1.00 \times 10^{-4}$  in model  
 425 CM1 and from  $1.17 \times 10^{-4}$  to  $1.00 \times 10^{-4}$  in model CM2. Since U0126 is known to inhibit  
 426 C/EBP, this suggests that C/EBP does not have a major influence on TNF- $\alpha$ .

427

| Parameter | CM1          |               | CM2          |               | Interpretation                                                                                                                 |
|-----------|--------------|---------------|--------------|---------------|--------------------------------------------------------------------------------------------------------------------------------|
|           | IL-1 $\beta$ | TNF- $\alpha$ | IL-1 $\beta$ | TNF- $\alpha$ |                                                                                                                                |
| $r_1$     | 9.01e-04     |               | 1.03e-03     |               | Parameters for NF- $\kappa$ B dynamics (second <sup>-1</sup> )                                                                 |
| $r_2$     | 3.05e-04     |               | 4.39e-04     |               |                                                                                                                                |
| $k_{01}$  | 3.89e-02     | 1.21e-04      | 4.77e-03     | 1.17e-04      | LPS-free transition rate $G_0$ to $G_1$ (second <sup>-1</sup> )                                                                |
| $b_{01}$  | NA           | 2.27e-02      | NA           | 2.09e-02      | Multiplicative factor for NF- $\kappa$ B induced increase in gene activation rate (second <sup>-1</sup> )                      |
| $k_{10}$  | 7.62e-03     | 4.67e-02      | 7.66e-02     | 5.48e-02      | LPS-free gene deactivation rate $G_1$ to $G_0$ (second <sup>-1</sup> )                                                         |
| $b_{10}$  | NA           | NA            | 6.60e+00     | NA            | Multiplicative factor for NF- $\kappa$ B induced decrease in gene deactivation ( $G_1$ to $G_0$ ) rate (second <sup>-1</sup> ) |
| $k_{12}$  | 3.93e-05     | 8.19e-03      | 5.50e-04     | 9.41e-03      | LPS-free transition rate $G_1$ to $G_2$ (second <sup>-1</sup> )                                                                |
| $b_{12}$  | 9.60e-03     | NA            | NA           | NA            | Multiplicative factor for NF- $\kappa$ B induced increase in transition rate $G_1$ to $G_2$ (second <sup>-1</sup> )            |

|                  |          |          |          |          |                                                                                                                       |
|------------------|----------|----------|----------|----------|-----------------------------------------------------------------------------------------------------------------------|
| $k_{21}$         | 8.37e-03 | 3.98e-03 | 8.79e-03 | 4.03e-03 | Transition rate from highly activated state to moderately activated state ( $G_2$ to $G_1$ ) ( $\text{second}^{-1}$ ) |
| $\alpha_0$       | 1.09e-04 | 3.61e-05 | 5.29e-05 | 2.60e-05 | Basal transcription rate when gene is at basal state $G_0$ (molecule/second)                                          |
| $\alpha_1$       | 1.64e-05 | 6.24e-01 | 1.00e-06 | 7.07e-01 | Transcription rate when gene is at $G_1$ (molecule/second)                                                            |
| $\alpha_2$       | 9.99e-01 | 5.39e-01 | 1.00e+00 | 5.41e-01 | Transcription rate when gene is at $G_2$ (molecule/second)                                                            |
| $\delta$         | 5.67e-05 | 2.29e-04 | 5.27e-05 | 2.16e-04 | mRNA degradation rate (molecule/second)                                                                               |
| $b_{01}^{MG}$    | NA       | 7.80e-03 | NA       | 7.18e-03 | MG-modulated value of $b_{01}$ ( $\text{second}^{-1}$ )                                                               |
| $b_{10}^{MG}$    | NA       | NA       | 6.80e-01 | NA       | MG-modulated value of $b_{10}$ ( $\text{second}^{-1}$ )                                                               |
| $b_{12}^{MG}$    | 2.83e-03 | NA       | NA       | NA       | MG-modulated value of $b_{12}$ ( $\text{second}^{-1}$ )                                                               |
| $k_{01}^{U0126}$ | 2.22e-03 | 1.00e-04 | 2.22e-03 | 1.00e-04 | U0126-modulated value of $k_{01}$ ( $\text{second}^{-1}$ )                                                            |

428

429 *Table 1 Fitted parameters for the two best performing combined multi-gene, multi-condition gene expression models. These are*  
 430 *obtained by fitting the model-predicted distributions of RNA copy number to data collected under three inhibitor conditions (no*  
 431 *inhibitors, MG132, and U0126).*

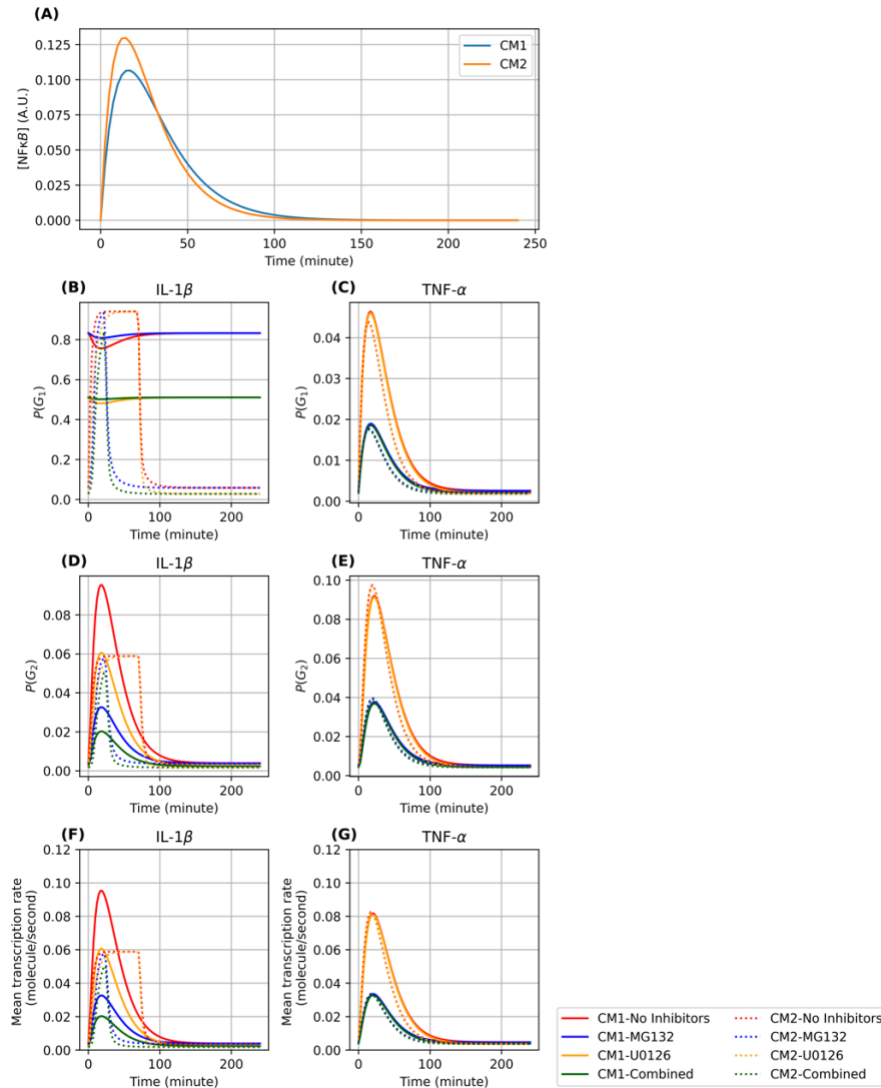

432

433

434

435 *Figure 7. Model-predicted downstream influence of NF- $\kappa$ B using the best two models. (A): Signal strength of NF $\kappa$ B in the*  
 436 *nucleus in arbitrary units (AU). (B-C): The time-varying probability of IL-1 $\beta$  and TNF- $\alpha$  to occupy the intermediate gene state*  
 437 *(G<sub>1</sub>). (D-E): The time-varying probability of IL-1 $\beta$  and TNF- $\alpha$  to occupy the final gene state (G<sub>2</sub>). (F-G): The time-varying mean*  
 438 *transcription rates for IL-1 $\beta$  and TNF- $\alpha$ , under four different inhibitor conditions (No inhibitors, MG132, U0126, both MG132*  
 439 *and U0126).*

## 440 Discussion

441

442 Single-cell measurements allow for a more complete description and characterization of gene  
 443 expression kinetics and regulatory mechanisms. Applying single-cell measurement techniques, we  
 444 have demonstrated that gene transcription heterogeneity of two key immune response genes, IL-  
 445 1 $\beta$  and TNF- $\alpha$ , occurs to a surprising extent within a seemingly uniform cell population following  
 446 an immune assault. Such measurements of cell-to-cell distribution can be more informative than  
 447 average values obtained from bulk measurements. For example, cells in the tail of the distribution  
 448 may ultimately dictate the fate of disease progression rather than the average response, such as in

449 the case of highly stimulated cells that lead to a cytokine storm. This is analogous to understanding  
450 how certain individuals (such as super-spreaders) may dictate the pathway of an epidemic more  
451 than basic reproduction number ( $R_0$ ) values.[43] Here we show that IL-1 $\beta$  and TNF- $\alpha$  genes, while  
452 upregulated upon bacterial LPS exposure, can be suppressed at the transcriptional level by the  
453 inhibitors MG132 and U0126. Interestingly, each of these inhibitors has a different kinetic effect.  
454 U0126 inhibits early IL-1 $\beta$  expression, while MG132 causes a delayed inhibition pattern,  
455 suggesting that C/EBP signaling occurs prior to NF- $\kappa$ B activity, in response to LPS (see Figure 6).  
456 Additionally, we show that TNF- $\alpha$  is predominantly and rapidly inhibited by MG132 treatment,  
457 suggesting that NF- $\kappa$ B is the primary upstream regulator of TNF- $\alpha$  expression in response to LPS.  
458

459 To describe these results, we considered 36 potential stochastic models to reproduce IL-1 $\beta$  and  
460 TNF- $\alpha$  activity, and we found that the time-course of the cell-to-cell distributions of transcript  
461 copy numbers for both IL-1 $\beta$  and TNF- $\alpha$  could be adequately captured by two stochastic models,  
462 each having three states for gene transcription. Moreover, the effects of anti-inflammatory drugs  
463 MG132 and U0126 on the mRNA copy numbers of these two genes could be captured with both  
464 three state models. While the kinetic models were fit to data for each drug acting independently,  
465 both models were able to predict the data well for the combined drug treatment. The final two  
466 models selected identical mechanisms and dynamics for the regulation of TNF- $\alpha$  activity, but  
467 different mechanisms for the control IL-1 $\beta$ . Interestingly, although both models make  
468 indistinguishable predictions for the distributions of mature IL-1 $\beta$  mRNA in all conditions and  
469 time points measured for this study (Supplementary Figure S6 and S7), the two models make  
470 qualitatively and quantitatively different predictions for other, as yet untested experimental  
471 conditions. Specifically, the two models differ in their predictions for the instantaneous  
472 transcription rate at early times, where model CM1 predicts a short period of high transcription  
473 activity and model CM2 predicts a sustained period of moderate strength activity (Figure 7F).  
474 Furthermore, the two models also differ how the instantaneous transcription rate would be affected  
475 by MG132 treatment. In principle, our analyses suggest that these two models could be resolved  
476 using intron smFISH labeling to measure nascent transcription activity to quantify instantaneous  
477 transcription rates in shorter time scale experiments (e.g., 40 to 80 minutes). These experiments  
478 are beyond the scope of the current study and are left for future investigation.  
479

480 Our results suggest that the integration of single-cell measurements and predictive kinetic  
481 modeling can lead to improved mechanistic understanding that could eventually lead to more  
482 effective combination therapies against chronic and acute inflammatory diseases. We note that  
483 while there are possible ways to extend the model proposed in this study to describe the joint  
484 expression of both IL-1 $\beta$  and TNF- $\alpha$ , the large state space required to analyze the joint expression  
485 of more than two mRNA species, coupled with the complexity of integrating time-varying kinase  
486 signals, poses a prohibitive challenge for current computational tools. Advances in high  
487 performance FSP-based inference methods (e.g., [44]) may potentially allow us to tackle the joint  
488 modeling approach in future work. Overall, this study emphasizes the need for further use of  
489 single-cell measurements to understand gene responses in order to identify outlier cells and capture  
490 full distributions.[45] Single-cell gene expression measurements combined with the appropriate  
491 model could provide otherwise overlooked insights into the kinetics, spatial distribution, and  
492 regulatory mechanisms of any number of genes.  
493

494



## 495 Acknowledgements

496  
497 DK, SA, EH-G, and JHW were supported by the Los Alamos Directed Research and  
498 Development (LDRD) program. HV and BM were supported by National Institutes of Health  
499 under grant R35 GM124747. This work was performed, in part, at the Center for Integrated  
500 Nanotechnologies, an Office of Science User Facility operated for the U.S. Department of  
501 Energy (DOE) Office of Science. Los Alamos National Laboratory, an affirmative action equal  
502 opportunity employer, is managed by Triad National Security, LLC for the U.S. Department of  
503 Energy's NNSA, under contract 89233218CNA000001.  
504  
505

## 506 REFERENCES

- 507
- 508 1. Chen, L., et al., *Inflammatory responses and inflammation-associated diseases in organs*. 2018.  
509 **9**(6): p. 7204.
- 510 2. Tisoncik, J.R., et al., *Into the eye of the cytokine storm*. J. Microbiol. Mol. Biol. Rev., 2012. **76**(1):  
511 p. 16-32.
- 512 3. Grishman, E.K., P.C. White, and R.C. Savani, *Toll-like receptors, the NLRP3 inflammasome, and*  
513 *interleukin-1 beta in the development and progression of type 1 diabetes*. Pediatric Research,  
514 2012. **71**(6): p. 626-632.
- 515 4. Rao, P. and E.E. Knaus, *Evolution of nonsteroidal anti-inflammatory drugs (NSAIDs):*  
516 *cyclooxygenase (COX) inhibition and beyond*. Journal of Pharmacy Pharmaceutical Sciences,  
517 2008. **11**(2): p. 81-110s.
- 518 5. Duan, W., et al., *Anti-inflammatory effects of mitogen-activated protein kinase kinase inhibitor*  
519 *U0126 in an asthma mouse model*. The Journal of Immunology, 2004. **172**(11): p. 7053-7059.
- 520 6. Yoshida, T., et al., *Proteasome inhibitor MG132 induces death receptor 5 through*  
521 *CCAAT/enhancer-binding protein homologous protein*. J Cancer research, 2005. **65**(13): p. 5662-  
522 5667.
- 523 7. Guo, N. and Z. Peng, *MG132, a proteasome inhibitor, induces apoptosis in tumor cells*. J Asia-  
524 Pacific Journal of Clinical Oncology, 2013. **9**(1): p. 6-11.
- 525 8. Davies, S.P., et al., *Specificity and mechanism of action of some commonly used protein kinase*  
526 *inhibitors*. Biochemical Journal, 2000. **351**: p. 95-105.
- 527 9. Han, Y.H., et al., *The effect of MG132, a proteasome inhibitor on HeLa cells in relation to cell*  
528 *growth, reactive oxygen species and GSH*. J Oncology reports, 2009. **22**(1): p. 215-221.
- 529 10. Bougarn, S., et al., *Validation of candidate reference genes for normalization of quantitative PCR*  
530 *in bovine mammary epithelial cells responding to inflammatory stimuli*. J Journal of dairy  
531 science, 2011. **94**(5): p. 2425-2430.
- 532 11. Kim, H.-J., et al., *Systemic analysis of heat shock response induced by heat shock and a*  
533 *proteasome inhibitor MG132*. 2011. **6**(6).
- 534 12. Jiang, K., et al., *RNA sequencing from human neutrophils reveals distinct transcriptional*  
535 *differences associated with chronic inflammatory states*. J BMC medical genomics, 2015. **8**(1): p.  
536 55.
- 537 13. Patel, A.P., et al., *Single-cell RNA-seq highlights intratumoral heterogeneity in primary*  
538 *glioblastoma*. 2014. **344**(6190): p. 1396-1401.
- 539 14. Kamme, F., et al., *Single-cell microarray analysis in hippocampus CA1: demonstration and*  
540 *validation of cellular heterogeneity*. 2003. **23**(9): p. 3607-3615.
- 541 15. Battich, N., T. Stoeger, and L. Pelkmans, *Image-based transcriptomics in thousands of single*  
542 *human cells at single-molecule resolution*. Nature methods, 2013. **10**(11): p. 1127.

- 543 16. Raj, A., et al., *Imaging individual mRNA molecules using multiple singly labeled probes*. Nature  
544 Methods, 2008. **5**(10): p. 877-879.
- 545 17. Munsky, B., G. Neuert, and A. van Oudenaarden, *Using Gene Expression Noise to Understand*  
546 *Gene Regulation*. Science, 2012. **336**(6078): p. 183-187.
- 547 18. Munsky, B., et al., *Distribution shapes govern the discovery of predictive models for gene*  
548 *regulation*. Proceedings of the National Academy of Sciences of the United States of America,  
549 2018. **115**(29): p. 7533-7538.
- 550 19. Saliba, A.E., et al., *Single-cell RNA-seq: advances and future challenges*. Nucleic Acids Research,  
551 2014. **42**(14): p. 8845-8860.
- 552 20. Shalek, A.K., et al., *Single-cell RNA-seq reveals dynamic paracrine control of cellular variation*.  
553 Nature, 2014. **510**(7505): p. 363-369.
- 554 21. Kalisky, T., P. Blainey, and S.R. Quake, *Genomic Analysis at the Single-Cell Level*, in *Annual*  
555 *Review of Genetics, Vol 45*, B.L. Bassler, M. Lichten, and G. Schupbach, Editors. 2011, Annual  
556 Reviews: Palo Alto. p. 431-445.
- 557 22. Shalek, A.K., et al., *Single-cell transcriptomics reveals bimodality in expression and splicing in*  
558 *immune cells*. Nature, 2013. **498**(7453): p. 236-240.
- 559 23. Macosko, E.Z., et al., *Highly Parallel Genome-wide Expression Profiling of Individual Cells Using*  
560 *Nanoliter Droplets*. Cell, 2015. **161**(5): p. 1202-1214.
- 561 24. Femino, A., et al., *Visualization of single RNA transcripts in situ*. Science, 1998. **280**(5363): p.  
562 585-590.
- 563 25. Shepherd, D.P., et al., *Counting Small RNA in Pathogenic Bacteria*. Analytical Chemistry, 2013.  
564 **85**(10): p. 4938-4943.
- 565 26. Chen, K.H., et al., *Spatially resolved, highly multiplexed RNA profiling in single cells*. Science,  
566 2015. **348**(6233): p. 15.
- 567 27. Lubeck, E. and L. Cai, *Single-cell systems biology by super-resolution imaging and combinatorial*  
568 *labeling*. Nature Methods, 2012. **9**(7): p. 743-U159.
- 569 28. Coskun, A.F. and L. Cai, *Dense transcript profiling in single cells by image correlation decoding*.  
570 Nature Methods, 2016. **13**(8): p. 657-+.
- 571 29. Feinerman, O., et al., *Single-cell quantification of IL-2 response by effector and regulatory T cells*  
572 *reveals critical plasticity in immune response*. Molecular systems biology, 2010. **6**(1).
- 573 30. Shalek, A.K., et al., *Single-cell transcriptomics reveals bimodality in expression and splicing in*  
574 *immune cells*. 2013. **498**(7453): p. 236-240.
- 575 31. Tay, S., et al., *Single-cell NF- $\kappa$ B dynamics reveal digital activation and analogue information*  
576 *processing*. 2010. **466**(7303): p. 267-271.
- 577 32. Sobotta, S., et al., *Model based targeting of IL-6-induced inflammatory responses in cultured*  
578 *primary hepatocytes to improve application of the JAK inhibitor ruxolitinib*. Frontiers in  
579 physiology, 2017. **8**: p. 775.
- 580 33. Kalb, D.M., et al., *Single-cell correlations of mRNA and protein content in a human monocytic cell*  
581 *line after LPS stimulation*. Plos One, 2019. **14**(4): p. 16.
- 582 34. Wang, Z., et al., *U0126 prevents ERK pathway phosphorylation and interleukin-1beta mRNA*  
583 *production after cerebral ischemia*. Chinese medical sciences journal=, 2004. **19**(4): p. 270-275.
- 584 35. McQuarrie, D.A.J.J.o.a.p., *Stochastic approach to chemical kinetics*. 1967. **4**(3): p. 413-478.
- 585 36. Van Kampen, N., *Stochastic processes in physics and chemistry, 3rd edn Amsterdam*. 2007,  
586 Netherlands: Elsevier.
- 587 37. Munsky, B. and M.J.T.J.o.c.p. Khammash, *The finite state projection algorithm for the solution of*  
588 *the chemical master equation*. 2006. **124**(4): p. 044104.
- 589 38. Adamik, J., et al., *Distinct Mechanisms for Induction and Tolerance Regulate the Immediate Early*  
590 *Genes Encoding Interleukin 1 beta and Tumor Necrosis Factor alpha*. Plos One, 2013. **8**(8): p. 17.

- 591 39. Matsuo, Y., et al., *Proteasome Inhibitor MG132 Inhibits Angiogenesis in Pancreatic Cancer by*  
592 *Blocking NF-kappa B Activity*. Digestive Diseases and Sciences, 2010. **55**(4): p. 1167-1176.
- 593 40. Senecal, A., et al., *Transcription factors modulate c-Fos transcriptional bursts*. Cell Reports, 2014.  
594 **8**(1): p. 75-83.
- 595 41. Neuert, G., et al., *Systematic identification of signal-activated stochastic gene regulation*.  
596 Science, 2013. **339**(6119): p. 584-587.
- 597 42. Bagaev, A.V., et al., *Elevated pre-activation basal level of nuclear NF- $\kappa$ B in native macrophages*  
598 *accelerates LPS-induced translocation of cytosolic NF- $\kappa$ B into the cell nucleus*. 2019. **9**(1): p. 1-16.
- 599 43. Galvani, A.P. and R.M. May, *Dimensions of superspreading*. Nature, 2005. **438**(7066): p. 293-295.
- 600 44. Catanach, T.A., H.D. Vo, and B.J.a.p.a. Munsky, *Bayesian inference of Stochastic reaction*  
601 *networks using Multifidelity Sequential Tempered Markov Chain Monte Carlo*. 2020.
- 602 45. Hocine, S., et al., *Single-molecule analysis of gene expression using two-color RNA labeling in live*  
603 *yeast*. Nature methods, 2013. **10**(2): p. 119-121.

604

605
